14 **ABSTRACT:**

15 Habituated animals retain a latent capacity for robust engagement with familiar stimuli. In  
16 most instances, the ability to override habituation is best explained by postulating: (a) that  
17 habituation arises from the potentiation of inhibitory inputs onto stimulus-encoding assemblies;  
18 and (b) fast habituation override occurs through disinhibition. Previous work has shown that  
19 inhibitory plasticity contributes to specific forms of olfactory and gustatory habituation in  
20 *Drosophila*. Here we analyze how exposure to a novel stimulus causes override of gustatory  
21 (proboscis-extension reflex or “PER”) habituation. While brief sucrose contact with tarsal  
22 hairs causes naïve *Drosophila* to extend their proboscis, persistent tarsal exposure to sucrose  
23 reduces PER to subsequent sucrose stimuli. We show that in so habituated animals, either brief  
24 exposure of the proboscis to yeast or direct thermogenetic activation of sensory neurons  
25 restores the PER response to tarsal sucrose stimulation. Similar override of PER habituation  
26 can also be induced by brief thermogenetic activation of a population of TH (Tyrosine-  
27 Hydroxylase) positive neurons, a subset of which send projections to the SEZ. Significantly,  
28 sensory-neuron induced habituation override requires transmitter release from these TH-  
29 positive cells. Treatments that cause override specifically influence the habituated state, with  
30 no effect on the naïve sucrose response across a range of concentrations. Taken together, these  
31 and other findings are consistent with a model in which novel taste stimuli trigger activity in  
32 dopaminergic neurons which, directly or indirectly, inhibit GABAergic cells that drive PER  
33 habituation. The implications of these findings for general mechanisms of attentional and  
34 sensory override of habituation are discussed.

35

36

37 **SIGNIFICANCE STATEMENT:**

38 Behavioral habituation can be overcome when a new context requires an enhanced response to  
39 a familiar stimulus. However, the underlying mechanisms remain incompletely understood.  
40 Previous studies have provided evidence that habituation of the sucrose-induced proboscis  
41 extension reflex (PER) in *Drosophila* occurs through potentiation of inhibition onto the PER  
42 pathway. This work defines controlled protocols for override of PER habituation and uses  
43 them to outline the underlying circuit mechanisms. The results presented support a model in  
44 which novel taste stimuli cause dishabituation by activating a subset of tyrosine-hydroxylase-  
45 expressing neurons that inhibit GABAergic neurons whose potentiation underlies PER  
46 habituation. At a general level, these findings further highlight a central role for inhibition and  
47 disinhibition in the control of behavioral flexibility.

48

49 **INTRODUCTION.**

50 Habituation is a form of non-associative learning in which the response to a stimulus reduces  
51 with repeated or extended passive exposure. However, a latent ability to respond to the  
52 innocuous stimulus remains. Indeed, the phenomenon of “dishabituation” is a classical,  
53 defining feature of the habituated state, distinguishing it from sensory or synaptic fatigue  
54 (Thompson and Spencer, 1966; Rankin et al., 2009; Ramaswami, 2014). In this article we  
55 often use the term “override” in place of dishabituation, which while largely synonymous,  
56 better acknowledges that behavioral responses can be reinstated not only by classic  
57 dishabituating (novel) stimuli, but also by attentional mechanisms recruited during task  
58 engagement ((COOKE and RAMASWAMI, 2020)

59 Both habituation and the associated phenomenon of dishabituation/ override have been  
60 described across different phyla of animal kingdom (Glanzman et al., 1989; Zaccardi et al.,

61 2004; Smith et al., 2009; Ramaswami, 2014). Two broad observations are relevant here. First,  
62 mechanisms underlying very short and longer lasting forms of habituation may differ, with the  
63 latter more likely to involve inhibitory potentiation (Ramaswami, 2014; Shen et al., 2020).  
64 Second, largely due to the difficulty of necessary behavioral experiments, in most instances  
65 where habituation override has been reported, it is not rigorously distinguished from a potential  
66 confounding process of response sensitization (Castellucci et al., 1970; Hawkins et al., 1998;  
67 Asztalos et al., 2007a; Asztalos et al., 2007b). Thus, although arguments and evidence support  
68 a disinhibitory mechanism (Fischer et al., 1997; Das et al., 2011; Kato et al., 2015; Ogg et al.,  
69 2018) the neural pathways and mechanisms of habituation override remain incompletely  
70 characterized. Here we address this issue in the gustatory system of *Drosophila*.

71 *Drosophila* sample and taste potential foods via chemosensory hairs on their tarsi (distal leg  
72 segments) and their proboscis (the main feeding organ) (Stocker, 1994; Montell, 2009). Sugars  
73 detected by sensory hairs trigger reflexive extension of proboscis to enable feeding. This  
74 proboscis extension reflex (PER) can be conveniently induced in insects by experimental  
75 application of sucrose or other sweet tastants to tarsal hairs (Minnich, 1921; Dethier, 1976).  
76 The neural circuit for PER is only partially understood. It involves transmission of sensory  
77 information to the subesophageal zone (SEZ) where it is processed and communicated to  
78 command neurons whose activation triggers the motor programme required for coordinated  
79 contraction and relaxation of muscles that drive proboscis extension and retraction (Flood et  
80 al., 2013). When the tarsus is repeatedly stimulated with sucrose under conditions where  
81 proboscis extension is futile, then the PER response is reduced through a process that shows  
82 several classic features of behavioral habituation (Duerr and Quinn, 1982; Le Bourg, 1983;  
83 Fois et al., 1991; Engel and Wu, 2009; Paranjpe et al., 2012). Importantly, in habituated  
84 animals, a strong PER to sucrose is quickly restored if the fly is presented with a strong, novel  
85 sensory stimulus (Le Bourg, 1983; Fois et al., 1991; Paranjpe et al., 2012). Here, we build on

86 these and other previous studies to investigate circuit mechanisms that drive override of PER  
87 habituation.

88 We first independently reproduced prior experiments providing key support for increased  
89 inhibition in the PER pathway being the core mechanism for PER habituation (Paranjpe et al.,  
90 2012). Thereafter, to address mechanisms of habituation override, we developed better defined  
91 protocols for habituation override, which we achieved by: (a) yeast stimulation of the  
92 proboscis; (b) thermogenetic activation of yeast-responsive or bitter responsive sensory  
93 neurons; or (c) thermogenetic activation of a subpopulation of dopaminergic neurons.  
94 Crucially, each of these treatments specifically affects the response of habituated animals; none  
95 sensitize naïve animals to the taste of sucrose. We further show that both sensory stimulation  
96 procedures work through dopaminergic neurons to affect habituation override. While the data  
97 do not yet conclusively define all elements of the dishabituation circuit or the mechanism by  
98 which dopaminergic neurons trigger override, they support a model in which novel stimuli  
99 induce dopamine release in the SEZ, which acts to directly or indirectly inhibit inhibitory  
100 neurons that drive PER habituation. We suggest that this work: (a) circumscribes core elements  
101 of a sensory-central circuit for habituation override; (b) provides evidence for a new  
102 disinhibitory pathway in the *Drosophila* brain; and (c) supports an emerging framework in  
103 which latent perceptions, memories and behaviors may be generally activated through  
104 disinhibition (Sridharan and Knudsen, 2015; Barron et al., 2017; Wang and Yang, 2018).

105

## 106 **MATERIALS AND METHODS**

107 **Drosophila stocks:** Fly stocks were maintained on standard corn meal media. Canton S (CS)  
108 flies were used as wild-type controls unless otherwise stated. The stocks were obtained either  
109 from stock centres or as generous gifts from following sources: *Ir25a-Gal4* was provided by

110 Carlos Ribeiro (Champalimaud Centre for the Unknown, Lisbon, Portugal), *TH-C'-Gal4*, *TH-*  
111 *D'-Gal4* and *TH-C-Gal80* were generously provided by Mark Wu (Johns Hopkins University,  
112 Baltimore, MD), *Gad1-Gal4* was from Gero Miesenbock (Oxford University, Oxford, UK),  
113 *TH-Gal4* was provided by Gaiti Hassan (National Centre for Biological Sciences, Bangalore,  
114 India), *Gr66a-LexA*, *lexAop-CD4::spGFP11*; *UAS-CD4::spGFP1-10* and *LexAop-TRPA1*  
115 were provided by Kristin Scott (University of California, Berkley). *rut<sup>2080</sup>* and *UAS-rut<sup>+</sup>* were  
116 provided by Martin Heisenberg. *UAS-Shi<sup>ts</sup>* was obtained from Toshi Kitamoto (University of  
117 Iowa, Iowa city, IA), *UAS-TRPA1* was provided by Paul Garrity (Brandeis University,  
118 Waltham, MA). *Wg/CyO*; *Gr66a-Gal4* (BL 57670), *UAS-mCD8::GFP* (BL 5130), *UAS-*  
119 *CD8::RFP*, *LexAop-CD8::GFP* (BL 32229) were obtained from Bloomington Drosophila  
120 Stock Centre.

121 **Proboscis extension behaviour:** Proboscis extension behaviour was carried out as described  
122 in (Paranjpe et al., 2012). Briefly, 3-4 days old female flies were mounted individually, ventral  
123 side up, on a cover slip. The flies were kept in a humidified chamber for 2 hours for recovery.  
124 Tarsal hairs were stimulated with 2% sucrose using 1ml syringe needle. The naïve response  
125 score was determined after stimulating tarsal hairs five times. Failed PER response was scored  
126 as zero and complete proboscis extension was scored as one. Flies that showed naïve PER  
127 response less than three out of five times were discarded and not used for habituation  
128 experiments.

129 **Habituation of proboscis extension reflex:** Tarsal hairs were stimulated with 10% sucrose for  
130 10 minutes after which the legs were washed using distilled water. The habituated response or  
131 post exposure response was recorded by stimulating tarsus with 2% sucrose five times, similar  
132 to naïve response.

133 **Habituation Override** 10% yeast was presented to the proboscis for 1-minute in a spaced  
134 manner in order to prevent consumption of yeast and satiation. After exposure to yeast, flies  
135 were allowed to groom themselves for 1 minute so that any sticking yeast on the proboscis  
136 could be cleaned. PER response was recorded by stimulating tarsal hairs five times as described  
137 above.

138 For habituation override using mechanical stimulus, flies mounted on the cover slip were  
139 placed in a petri dish (35mm) and vortexed for 1 minute. Flies were allowed to recover from  
140 the shock for 1 minute before testing the response.

141 To distinguish override from sensitization, naïve response of flies were recorded at  
142 concentrations of sucrose lower than 2%. This was done as the PER response is maximum at  
143 2%, any difference as a result of manipulation would have been difficult to observe. Four  
144 concentrations of sucrose were tested- 0.1%, 0.5%, 1% and 2%. Flies were then exposed to  
145 either stimulus used for override or heat, for 1 minute. Post response was tested after 1 minute  
146 rest at RT.

147 **Heat-mediated manipulation** For TRPA1 and Shi<sup>ts</sup> experiments, flies were transferred to 32°  
148 and 34°C respectively on a dry bath for 1 minute. In case of Shi<sup>ts</sup> experiments, proboscis was  
149 stimulated with 10% yeast while at 34°C. Flies were given 1 minute rest at RT before testing  
150 PER response.

151 **Immunohistochemistry:** Adult brains were dissected in 1X PBS and fixed in 4%  
152 paraformaldehyde diluted in 1X PBS with 0.3% Triton-X (PTX) for 30 minutes at room  
153 temperature. Samples were washed with 0.3% PTX for 20 minutes three times at room  
154 temperature and incubated with primary antibody for 48 hours at 4°C on a shaker. Samples  
155 were again washed three times with 0.3% PTX for 20 minutes each. Secondary antibodies  
156 conjugated with Alexa Fluor-488, Alexa Fluor- 568 and Alexa Fluor- 647 (1:500, Invitrogen),

157 diluted in 0.3% PTX, were added and samples were incubated for 24 hours. Brain samples  
158 were again washed repeatedly three times for 20 minutes each and mounted in Vectashield (H-  
159 1000, Vector laboratories) on a glass slide with spacers. Images were acquired using Zeiss  
160 LSM 510 Meta microscope and Olympus Flouview (FV- 3000).

161 Following primary antibodies were used: rabbit anti-GFP (1:100, invitrogen), mouse anti-  
162 Bruchpilot (n82) (1:20, DSHB), mouse anti-GFP (Sigma, 1:100), rabbit anti-TH (1:1000,  
163 Invitrogen), chick anti-GFP (Abcam, 1:5000), rabbit anti-DsRed (1:100, Clontech).

164 **Statistical analysis:** Non parametric tests were used to analyse data. Friedman test was used to  
165 analyse habituation override experiments whereas Wilcoxon sign rank test was used for testing  
166 sensitization at different concentrations of sucrose. All the data was analysed using GraphPad  
167 Prism v8.4.2 software.

168

## 169 **RESULTS.**

### 170 **Habituation of the proboscis-extension reflex to sucrose**

171 Two-percent sucrose applied to tarsal hairs of immobilized, naïve flies induces robust and  
172 reproducible proboscis extension response. However, following extended 10-minute exposure  
173 to 10% sucrose solution, PER decreases from 92.41% to 28.96% (\*\*\*) $p < 0.0001$ , Wilcoxon test)  
174 (Fig 1A-B). No change in naïve PER response is seen if water is presented for 10 minutes  
175 instead of 10% sucrose (Fig1B). A previous study concluded that plasticity in central  
176 GABAergic neurons is required for PER habituation (Paranjpe et al., 2012). Given their  
177 significance for the inferred inhibitory mechanism for PER habituation, we independently  
178 repeated key experiments to re-examine: first, the need for the *rutabaga*-encoded adenylyl  
179 cyclase in PER habituation; and second, its reported sufficiency in *GAD1-Gal4* expressing,



180 predominantly GABAergic neurons for this function. Our results were consistent with and  
181 confirmed previously reported observations (Figure 1C).

182 Behavioral habituation is often distinguished from sensory or muscular fatigue by  
183 demonstrating the rapid reinstatement of the sensory response by strong, novel stimuli (Rankin  
184 et al., 2009; Ramaswami, 2014). Consistently, PER-habituated animals retain the ability to  
185 respond relatively robustly to sucrose, as evidenced following strong or novel sensory  
186 stimulation. Similar to olfactory habituation, strong mechanical stimulation (vortexing in a  
187 dish) for 1 minute substantially reinstates ( $*p= 0.01$ , Friedman test) the sucrose-induced PER  
188 in habituated flies, without affecting baseline sucrose sensitivity in naïve animals (Figure 1D-  
189 E; (Das et al., 2011; Paranjpe et al., 2012). Thus, the effect mechanical stimulation on PER is  
190 selective on the habituated state and represents a form of habituation override and not  
191 sensitization. In order to address the underlying circuit mechanisms, we first looked to identify  
192 more precisely defined sensory stimuli that could cause override of PER habituation.

193

#### 194 **Novel stimuli override PER habituation**

195 *Drosophila* are attracted by the taste of yeast. Gustatory receptor neurons (GRNs) that respond  
196 to yeast components have been recently identified (Fischler et al., 2007; Wisotsky et al., 2011;  
197 Ganguly et al., 2017); (Steck et al., 2018). To examine whether the novel taste of yeast could  
198 influence PER habituation to sucrose, we applied a 10% yeast solution to the fly labellum,  
199 which has previously been shown to possess yeast-responsive GRNs (Steck et al., 2018), and  
200 tested if this resulted in override of sucrose habituation. Application of yeast to the labellum  
201 substantially reinstated the PER response to tarsal sucrose stimulation in PER-habituated  
202 animals ( $*p= 0.014$ , Friedman test; Fig 2A-B). In contrast, 10% sucrose solution, which  
203 should be familiar to the flies, when applied to the labellum of habituated flies had no effect

204 on PER (Fig 2B). Thus, a brief experience of a novel and in this case, attractive stimulus  
205 appears capable of inducing habituation override.

206 We further looked to identify a single GRN class responsive to yeast components that may be  
207 sufficient to drive dishabituation. To do this, we expressed heat-activated cation-permeable  
208 TRPA1 channels in yeast-responsive GRNs and tested if heat-induced activity in these cells,  
209 which bypassed the need for normal ligand-receptor interactions, would result in dishabituation  
210 (Hamada et al., 2008). Such experiments showed that “thermogenetic” activation of the *Ir25a*  
211 class of sensory neurons is sufficient to cause PER habituation override.

212 TRPA1 channels open at temperatures above 25°C; thus, activation of TRPA1-expressing  
213 neurons can be temporally controlled by exposing experimental animals to temperatures where  
214 the channel is either closed (RT) or open (above 25°C). We expressed TRPA1 in yeast  
215 responsive *Ir25a-Gal4* positive sensory neurons (Steck et al., 2018). These flies were  
216 habituated to sucrose at room temperature (RT, 21°C), transferred to 32°C post-habituation for  
217 1 minute and then tested for PER. Thermogenetic activation of *Ir25a*-expressing GRNs was  
218 sufficient to cause rapid override of sucrose habituation (Fig 2C). Thus, after *Ir25a* activation,  
219 PER-habituated animals showed significantly increased PER to tarsal sucrose stimulation  
220 (\*\**p*=0.0012, Friedman test). Similar 32°C exposure of genetic control animals not expressing  
221 TRPA1 did not affect PER habituation (Fig 2C).

222 To distinguish between the novelty and attractiveness of yeast taste as being primarily  
223 instrumental in override, we also examined, whether thermogenetic activation of bitter-  
224 compound responsive *Gr66a* expressing GRNs could similarly affect override of PER  
225 habituation. Thus, we expressed TRPA1 in *Gr66a-Gal4* positive neurons and examined how  
226 sucrose-responsiveness of flies habituated at RT was altered after a brief 1-minute shift to 32°C.  
227 Sucrose induced PER increased from 6.67% to 56.29% (\*\**p* = 0.0042, Friedman test)

228 indicating that brief activation of bitter-taste sensing *Gr66a*-positive neurons is sufficient to  
229 induce dishabituation. The observation that perception of novel bitter taste as well as novel  
230 yeast taste can promote override of PER habituation strongly indicates that it is the novelty of  
231 the dishabituating stimulus, rather than its attractiveness, that drives habituation override (Fig  
232 2D).

233 Does novelty-induced override of PER habituation represent a specific effect on the habituated  
234 state or a general sensitization of the sensory response? To differentiate between these  
235 possibilities, we tested whether and how yeast exposure, *Ir25a*-neuron activation or *Gr66a*-  
236 neuron activation altered PER in naïve flies to a range of sucrose concentrations. If the increase  
237 in PER response in habituated flies were due to sensitization, then we would expect an increase  
238 in PER after the novel stimulus is applied to naïve animals. However, as shown in 3A, 3B and  
239 3C, there is no significant difference in PER response before and after presentation of yeast or  
240 *Ir25a* or *Gr66a*-GRN activation respectively. Thus, it can be concluded that the reinstatement  
241 of PER response that we observe in our experiments is due to a process that specifically acts  
242 on neural correlates of PER habituation, not broadly on taste perception.

243

#### 244 **Artificial activation of Tyrosine-Hydroxylase (TH) expressing neurons overrides PER** 245 **habituation.**

246 Across species, novel stimuli trigger central release of neuromodulators that confer or enhance  
247 their salience (Ranganath and Rainer, 2003; Kafkas and Montaldi, 2018). In particular, the  
248 activity of dopaminergic neurons has been implicated in the novelty response both in insects  
249 and in mammalian systems, (Hattori et al., 2017; Morrens et al., 2020). We therefore  
250 investigated whether thermogenetic activation of *Drosophila* tyrosine-hydroxylase (TH)

251 expressing central dopaminergic neurons would be (a) sufficient and (b) necessary for novel-  
252 taste induced override of PER habituation.

253 In PER-habituated *TH-Gal4>UAS-TRPA1* animals, 1-minute exposure to 32°C to drive  
254 thermogenetic activation of *TH-Gal4* expressing neurons resulted in rapid habituation override  
255 (Fig 4A). In PER-habituated animals, sucrose-induced PER was close to 12%; in these same  
256 animals, activation of TH expressing neurons increased PER to 60% (\*\*p = 0.0004, Friedman  
257 test). Significantly, activation of TH Gal4 neurons had no effect on the innate response to  
258 sucrose in naïve flies (Fig 4B). Thus, activation of these modulatory neurons causes  
259 habituation override, not general taste sensitization.

260 *TH-Gal4* labels around 200 neurons in the *Drosophila* brain (Friggi-Grelin et al., 2003). In  
261 order to more tightly define *TH*-expressing cells involved in PER-habituation override, we  
262 tested two non-overlapping subsets of *TH-Gal4* positive neurons, marked by *TH-D'-Gal4* and  
263 *TH-C'-Gal4* drivers (which labels ~54±5 and ~45±3 neurons respectively) for their potential  
264 roles. While 1-minute thermogenetic activation of *TH-D'* neurons had no effect on PER  
265 habituation, similar activation of neurons labelled by *TH-C'-Gal4* significantly increased PER  
266 response from 28.72% in control habituated flies, to 57.81% after *TH-C'* activation (\*\*p=  
267 0.0042, Friedman test Fig 4C). Moreover, *TH-Gal4*-driven habituation override required  
268 activity in *TH-C'* cell population: thus, 32°C exposure did not trigger PER habituation override  
269 in *TH-C-Gal80; TH-Gal4> UAS TRPA1* flies, in which Gal80 expression prevented TRPA1  
270 expression in the *TH-C'* subset of *TH-Gal4* neurons (Fig 4D). This indicates that activity in  
271 *TH-C'* subset of cells is necessary and sufficient to cause habituation override. To further  
272 support this conclusion, we checked and confirmed that activation of *TH-C'* neurons had no  
273 significant effect on the PER of naïve flies across a range of sucrose concentrations (Fig 4E)  
274 confirming that *TH-C'* neurons specifically influence mechanisms of habituation, rather than  
275 general taste perception.

276 Significantly, a small subset of *TH-C'* neurons ( $\sim 13 \pm 6$ ) are present locally in the SEZ  
277 (suboesophageal zone), an area which not only receives inputs from taste sensory neurons, but  
278 also houses interneurons and motor neurons involved in proboscis extension (Gordon and  
279 Scott, 2009; Kain and Dahanukar, 2015). Thus, some *TH-C'* neurons are well positioned to  
280 mediate sensory-driven novelty signals that influence mechanisms of PER habituation.

281

### 282 **A subset of TH-expressing neurons mediate novelty-induced habituation override.**

283 In order to test whether the activity of *TH-Gal4* and *TH-C'-Gal4* neurons is necessary for  
284 novel-taste induced override of PER habituation, we examined whether novel-taste stimulation  
285 could cause habituation override under conditions where synaptic output from *TH-Gal4* or *TH-*  
286 *C'-Gal4* neurons was blocked. To achieve this, we expressed the temperature-sensitive,  
287 dominant-negative *Shi<sup>ts1</sup>* mutant form of dynamin in these neurons and tested whether a one-  
288 minute exposure to 10% yeast at 34°C could override habituation in *TH-Gal4, UAS-Shi<sup>ts1</sup>* and  
289 *TH-C'-Gal4 UAS-Shi<sup>ts1</sup>* at temperatures restrictive for *Shi<sup>ts1</sup>* dynamin function.

290 At permissive (room) temperatures, *TH-Gal4, UAS-Shi<sup>ts1</sup>* and *TH-C'-Gal4, UAS-Shi<sup>ts1</sup>* flies  
291 behaved similarly to wild-type flies, showing both robust PER habituation after 10 minutes of  
292 tarsal sucrose exposure (Fig 5A) and significant PER dishabituation following brief (1 min)  
293 exposure of their labella to 10% yeast solution (Fig 5A). The respective efficiency of PER in  
294 habituated and dishabituated animals (before and after yeast exposure) were 34.05% and  
295 77.29% (\*\*p = 0.0008, Friedman test) and 13.46% and 48.46% (\*p = 0.045, Friedman test)  
296 respectively (Fig 5A).

297 In contrast, if after PER habituation the same flies were shifted to and exposed to 10% yeast at  
298 34°C, where the essential function of dynamin in transmitter release would be compromised in  
299 *Shi<sup>ts1</sup>*-expressing cells, then habituation override was significantly impaired as compared to

300 controls (Fig 5A). Thus, yeast-induced dishabituation of control flies not expressing *Shi<sup>ts1</sup>* at  
301 34°C was substantially more efficient (\*\*p= 0.0015), than of *TH-Gal4*, *UAS-Shi<sup>ts1</sup>* flies at the  
302 same temperature (Fig 5A). Similarly, dishabituation of control flies not expressing *Shi<sup>ts1</sup>* was  
303 also substantially more efficient at 34°C (\*\*\*p = 0.0001, Friedman test), than of *TH-C'-Gal4*,  
304 *UAS-Shi<sup>ts1</sup>* flies, expressing temperature-sensitive mutant dynamin in *THC'-Gal4* neurons.  
305 These data argue that presynaptic activity in *TH-C'-Gal4* and *TH-Gal4* positive cells is required  
306 for yeast-induced override of PER habituation (Fig 5A).

307 An important caveat to the above conclusion is that dopaminergic neuron activation may be  
308 associated with motivation or reward prediction and therefore be fundamentally required for  
309 high levels of PER. In such a scenario, inactivation of TH-expressing cells would be expected  
310 to generally reduce levels of PER. To address this issue and test whether the apparently  
311 reduced override in Fig 5A is an artifact of blocking dopaminergic neurons during yeast  
312 exposure, we measured the innate response to sucrose in naïve flies with and without blockage  
313 of synaptic transmission in dopaminergic neurons (Fig 5B). There was no significant  
314 difference in the innate response to 2% sucrose, confirming a more restricted role for these TH  
315 positive cells in the override of habituation.

### 316 **Sensory neurons projections in SEZ overlap spatially with projections of TH-neurons**

317 In the mushroom body, dopaminergic neurons potentially compute novelty by combining  
318 excitatory inputs from olfactory sensory channels with inhibitory inputs driven by familiarity  
319 encoding interneurons (Zhao et al., 2021) (and see Discussion). If TH-positive cells were to  
320 play a similar role in the SEZ, then they would be predicted to receive direct or indirect inputs  
321 from taste sensory neurons as well as input from familiarity-representing inhibitory neurons.  
322 Previous work has shown that processes from some TH-positive neurons are present in the SEZ  
323 which also contains presynaptic endings of taste sensory neurons, processes of local

324 interneurons and dendrites of motor neurons involved in proboscis extension (Figure 6A; (Liu  
325 et al., 2012)). Therefore, we considered the possibility that taste sensory neurons make contacts  
326 with *TH*-positive processes.

327 To test whether taste-sensory neurons carrying dishabituating signals form connections, direct  
328 or indirect, with TH-neuron processes in the SEZ, we used the GFP-reconstitution across  
329 synaptic partners (GRASP) technique, which requires the use of dual binary transcription  
330 systems (based on LexA and Gal4 transcription factors) to separately express two  
331 complementing fragments of GFP, one in sensory neurons and the other in TH neurons.  
332 Limited by the immediate availability of transgenes, we were technically restricted to analyzing  
333 TH connections with neurons in which gene expression could be controlled by LexA. This  
334 was possible for bitter-taste responsive *Gr66a* neurons but not for the yeast-responsive *Ir25a*  
335 class.

336 We first examined whether *Gr66a* axonal projections and *TH-Gal4* marked processes were  
337 present in close proximity within the SEZ, by examining the relative localization of GFP driven  
338 in *Gr66a*-expressing neurons with RFP in *TH*-positive cells. Processes of sensory neurons  
339 expressing *Gr66a-LexA*-driven GFP and dopaminergic neurons expressing *TH-Gal4* driven  
340 RFP showed close proximity (Fig6A). Further, GRASP experiments showed that two halves  
341 of split GFP, one expressed in *Gr66a* neurons and the other in *TH*-positive cells could combine  
342 to reconstitute GFP fluorescence within the SEZ (Fig 6B). Robust fluorescence reconstitution  
343 was seen in 8/13 experimental animals compared to 0/15 total animals expressing only one  
344 split-GFP component. Thus, GRASP experiments confirm that the processes of *Gr66a* axons  
345 and tyrosine-hydroxylase expressing cells come in close proximity of each other. However,  
346 due to the limitation of the GRASP technique used it cannot be established certainly if there is  
347 a direct synapse between the two cell types.

348 These data predict that habituation override induced by thermogenetic activation of Gr66a cells  
349 should require activity in *TH-Gal4* positive cells. We tested this prediction by creating and  
350 analysing PER habituation and dishabituation in *Gr66a-LexA/ LexAop-TRPA1; TH-Gal4/*  
351 *UAS-Shi<sup>ts1</sup>* and control *Gr66a-LexA/LexAop-TRPA1; TH-Gal4/+* lines at temperatures  
352 permissive and restrictive for Shi<sup>ts1</sup> dynamin. As shown (Fig 6C), both lines showed robust  
353 PER and PER habituation. One minute-exposure to 34°C in control flies permissive for  
354 synaptic transmission from *TH*-positive neurons resulted in significant (\*p = 0.02, Friedman  
355 test) override of habituation. However, similar 34°C thermogenetic stimulation of *Gr66a*  
356 neurons in experimental flies where synaptic transmission from TH-positive neurons is blocked  
357 did not result in override of PER habituation. Together the anatomical and behavioral data  
358 indicate that *Gr66a*-expressing bitter taste sensory neurons are functionally connected to *TH*-  
359 expression modulatory neurons whose activity is required for PER habituation override.

360 Control experiments demonstrating that blocking synaptic output from *TH*-expressing cells  
361 has no effect on basal PER response in naïve animals further confirm that transmitter release  
362 from *TH*-neurons is required for override of neuronal mechanisms of habituation, not for the  
363 innate response to sucrose (Fig 5B).

364

365

## 366 **DISCUSSION**

367 Animal behavior is profoundly flexible. Thus, at any time, multiple potential behavioral  
368 programmes remain dormant, while a subset relevant to specific contexts are active. A growing  
369 body of evidence suggests that inhibitory inputs play a major role in preserving perceptions,  
370 behaviors and memories in dormant form until required (Barron et al., 2017). Thus, a given  
371 context, by recruiting disinhibitory circuits may override inhibition to release latent



372 perceptions, motor programmes and memories appropriate to that context. While the  
373 overarching principles are increasingly appreciated, there is still limited understanding of how  
374 these are implemented in cells and circuits. While there are many potential reasons for this,  
375 the difficulty in studying mechanisms of override has been substantially caused by the paucity  
376 of systems in which both mechanisms of habituation or cognitive silencing can be addressed  
377 as well as where robust override can be experimentally achieved.

378 The results we present outline essential elements within a *Drosophila* circuit that overrides  
379 habituation, in this case of the sucrose-evoked proboscis extension reflex. In doing so, they  
380 connect sensory neurons mediating override to neuromodulatory neurons projecting to the  
381 SEZ, which houses interneurons and motor neurons that control proboscis extension. When  
382 taken together with published work showing that increased inhibition underlies PER  
383 habituation, these findings are significant because they circumscribe a central circuit for  
384 habituation override and add to the growing literature on the role and mechanism of  
385 disinhibition in gating animal cognition.

386 Previous work in *Drosophila* concluded that PER habituation arises from increased sucrose-  
387 evoked inhibition onto neurons that drive proboscis extension (Paranjpe et al., 2012). Two  
388 findings, which closely mirror observations on olfactory habituation, provided key support for  
389 this conclusion (Das et al., 2011; Paranjpe et al., 2012). First, the *rutabaga*-encoded adenylyl  
390 cyclase is required specifically in inhibitory neurons for PER habituation, an observation that  
391 we have independently confirmed in this study (Figure 1). Second, experimental silencing of  
392 inhibitory neurons causes override of habituation. Together these observations indicate first,  
393 that increased GABAergic activity is required for the expression of PER habituation and  
394 second, that disinhibition could serve as strategy for habituation override. How might such  
395 disinhibition be biologically achieved? Our current experiments show that novel sensory  
396 experience induces override of PER habituation through a pathway that requires activity in the

397 *TH-C'* class of dopaminergic neurons. As thermogenetic activation of *TH-C'* cells is also  
398 sufficient to override PER habituation, the data suggest a framework in which sensory stimuli  
399 activate *TH-C'* neurons, which directly or indirectly, inhibit GABAergic neurons responsible  
400 for habituation.

401 An important question to address is why novel but not familiar taste stimuli are effective for  
402 override? In physiological terms, how could activation of a novel subset of (*Ir25a* or *Gr66a*)  
403 sensory-neurons result in strong excitation of *TH-C'* cells, while similar levels of activation of  
404 sucrose-response sensory-neurons causes weaker excitation of the same *TH-C'* cells? We  
405 suggest that this occurs because familiar stimuli additionally recruit higher levels of inhibition  
406 onto *TH-C'* neurons. At a circuit level, there are multiple ways in which such a mechanism  
407 could be implemented, the simplest of which is shown schematically in Figure 7.

408 The model proposes that in the naïve state, sensory neurons (SN) excite excitatory projection  
409 neurons (PN) that activate the PER. These SNs also excite cognate inhibitory local  
410 interneurons (iLNs) and *TH-C'* neurons (either directly or indirectly via yet to be identified  
411 neuron). The iLNs are postulated to make weak inhibitory synapses onto PNs and *TH-C'* cells,  
412 while also receiving strong inhibition from *TH-C'*. Thus, novel stimuli result in weak total iLN  
413 excitation, strong PN excitation and robust PER. The imposition of a synaptic learning rule  
414 that coincident presynaptic and postsynaptic activity at inhibitory synapses leads to inhibitory  
415 synapse potentiation, generates the postulated habituated state, wherein PNs receive additional  
416 increased inhibition resulting in lower net excitation and reduced PER. At the same time the  
417 same learning rule also results in increased inhibition and therefore decreased net excitation of  
418 *TH-C'* neurons by “familiar” SNs. In this habituated state, the familiar tastant, causing only  
419 weak *TH-C'* excitation, would not disinhibit the PER pathway. However, a novel tastant would  
420 still trigger strong *TH-C'* cell activation, effective disinhibition of PN and thereby override of  
421 PER habituation. The above model places some constraints on SN-LN connectivity which have

422 yet to be examined or established: most significantly suggesting that different classes of SNs  
423 activate different subgroups of iLNs in the SEZ.

424 While our experiments lead to a comprehensive model for a habituation override circuit, they  
425 do not yet clarify several important issues. Most obviously many aspects of the proposed  
426 connectivity are inferred, rather than demonstrated by direct anatomical or physiological  
427 methods. The exact subset of *TH-C'* cells involved as well as the subtypes and connectivities  
428 of relevant inhibitory neurons in the SEZ remain unknown and crucially important to establish.  
429 The mechanism by which relevant *TH-C'* cells function has not been formally proven. While  
430 these cells are marked by three independent dopaminergic reporter lines, *TH-Gal4*, *TH-C'* and  
431 *TH-C-Gal80*, and therefore probably dopaminergic, it remains unclear whether dopamine  
432 release is required for habituation override. Our attempts to address this via knockdown of  
433 tyrosine hydroxylase through RNAi, or by various genetic manipulations of dopamine receptor  
434 expression did not yield definitive results, often because these manipulations affected baseline  
435 levels of PER and PER habituation.

436 However, given that the SEZ, which contains gustatory neurons axons as well as dendrites of  
437 motor neurons that drive PER, is likely to be numerically simple compared, the most  
438 parsimonious model for override would posit that taste sensory neurons trigger direct excitation  
439 of dopaminergic processes, which in turn acts within the SEZ to directly inhibit GABAergic  
440 cells (Pimentel et al., 2016) whose potentiation drives PER habituation.

441 The model above is consistent with observations on habituation override in mouse and Aplysia  
442 brains (Bristol and Carew, 2005; Smith et al., 2009; Kato et al., 2015; Ogg et al., 2018). In  
443 mouse, long term auditory habituation to a passively experienced tone is accompanied by  
444 increased activity in tone-responsive SOM+ neurons that inhibit similarly tuned pyramidal  
445 cells in the auditory cortex. However, if habituated mice are coaxed to attend to the same tone

446 (by a reward for successful engagement), then the behaving mice show overriding inhibition  
447 of SOM+ neurons and increased activity of downstream L2/3 pyramidal neurons (Kato et al.,  
448 2015). It appears likely that this disinhibition is accomplished by modulatory inputs onto  
449 upstream VIP+ neurons. A more recent analysis showed that cholinergic inputs into the mouse  
450 olfactory bulb could cause override of a fast form of olfactory habituation. Thus, electrical or  
451 optogenetically induced acetylcholine release into the bulb caused mice to override habituation  
452 and investigate a previously ignored odor (Ogg et al., 2018). While sensitization is not formally  
453 excluded here, these studies are consistent with an emerging theme wherein neuromodulators  
454 released in response to novel or meaningful stimuli (Vankov et al., 1995; Giovannini et al.,  
455 2001; Ranganath and Rainer, 2003; Hattori et al., 2017; Kafkas and Montaldi, 2018; Morrens  
456 et al., 2020) result in disinhibition which can either enhance learning or override habituation.

457 The experimental results described here provides multiple lines of circumstantial evidence in  
458 support of a novelty-induced dopaminergic pathway for disinhibition of sensory perception. It  
459 outlines a habituation override circuit all the way from sensory neurons that detect stimulus, to  
460 motor neurons that mediate behavioral response. In context of the increasingly widely  
461 appreciated role for disinhibition in the control of perception, cognition and behavior (Letzkus  
462 et al., 2015; Sridharan and Knudsen, 2015; Barron et al., 2017; Wang and Yang, 2018) we  
463 suggest that this work provides a valuable intellectual and biological foundation for future  
464 studies to comprehensively identify neurons and mechanisms involved in a central pathway for  
465 behaviorally important disinhibition.

466

## 467 **ACKNOWLEDGMENTS**

468 We thank Ali Asgar Bohra, Camilla Roselli, Tamara Boto and James Cooke for comments on  
469 the manuscript, Frederic Marion-Poll and members of Ramaswami and VijayRaghavan labs

470 for advice, support and useful discussions. We thank Carlos Ribeiro for valuable discussions  
471 and reagents, Pushkar Paranjpe for help setting up the PER assay, as well as the Bloomington  
472 stock centre and our many colleagues (mentioned in the text) for various *Drosophila* stocks  
473 used. The work was supported by a Wellcome Trust Investigator Award and a Science  
474 Foundation Ireland Investigator Programme Grant to MR, by core support from the National  
475 Centre for Biological Sciences (Tata Institute of Fundamental Research) to KVR and by a CSIR  
476 postgraduate fellowship and a Biocon-Trinity Scholarship to ST.

477

478

479

480 **References**

- 481 Asztalos Z, Arora N, Tully T (2007a) Olfactory jump reflex habituation in *Drosophila* and  
482 effects of classical conditioning mutations. *J Neurogenet* 21:1-18.
- 483 Asztalos Z, Baba K, Yamamoto D, Tully T (2007b) The fickle mutation of a cytoplasmic  
484 tyrosine kinase effects sensitization but not dishabituation in *Drosophila*  
485 *melanogaster*. *J Neurogenet* 21:59-71.
- 486 Barron HC, Vogels TP, Behrens TE, Ramaswami M (2017) Inhibitory engrams in perception  
487 and memory. *Proc Natl Acad Sci U S A* 114:6666-6674.
- 488 Bristol AS, Carew TJ (2005) Differential role of inhibition in habituation of two independent  
489 afferent pathways to a common motor output. *Learn Mem* 12:52-60.
- 490 Castellucci V, Pinsker H, Kupfermann I, Kandel ER (1970) Neuronal mechanisms of  
491 habituation and dishabituation of the gill-withdrawal reflex in *Aplysia*. *Science*  
492 167:1745-1748.
- 493 COOKE SF, RAMASWAMI M (2020) 17 Ignoring the Innocuous: Neural. *The Cognitive*  
494 *Neurosciences*:197.
- 495 Das S, Sadanandappa MK, Dervan A, Larkin A, Lee JA, Sudhakaran IP, Priya R, Heidari R,  
496 Holohan EE, Pimentel A, Gandhi A, Ito K, Sanyal S, Wang JW, Rodrigues V,  
497 Ramaswami M (2011) Plasticity of local GABAergic interneurons drives olfactory  
498 habituation. *Proc Natl Acad Sci U S A* 108:E646-654.
- 499 Dethier VG (1976) *The hungry fly: A physiological study of the behavior associated with*  
500 *feeding*. Oxford, England: Harvard U Press.
- 501 Duerr JS, Quinn WG (1982) Three *Drosophila* mutations that block associative learning also  
502 affect habituation and sensitization. *Proc Natl Acad Sci U S A* 79:3646-3650.
- 503 Engel JE, Wu CF (2009) Neurogenetic approaches to habituation and dishabituation in  
504 *Drosophila*. *Neurobiol Learn Mem* 92:166-175.

- 505 Fischer TM, Blazis DE, Priver NA, Carew TJ (1997) Metaplasticity at identified inhibitory  
506 synapses in *Aplysia*. *Nature* 389:860-865.
- 507 Fischler W, Kong P, Marella S, Scott K (2007) The detection of carbonation by the  
508 *Drosophila* gustatory system. *Nature* 448:1054-1057.
- 509 Flood TF, Iguchi S, Gorczyca M, White B, Ito K, Yoshihara M (2013) A single pair of  
510 interneurons commands the *Drosophila* feeding motor program. *Nature* 499:83-87.
- 511 Fois C, Medioni J, Le Bourg E (1991) Habituation of the proboscis extension response as a  
512 function of age in *Drosophila melanogaster*. *Gerontology* 37:187-192.
- 513 Friggi-Grelin F, Coulom H, Meller M, Gomez D, Hirsh J, Birman S (2003) Targeted gene  
514 expression in *Drosophila* dopaminergic cells using regulatory sequences from tyrosine  
515 hydroxylase. *J Neurobiol* 54:618-627.
- 516 Ganguly A, Pang L, Duong VK, Lee A, Schoniger H, Varady E, Dahanukar A (2017) A  
517 Molecular and Cellular Context-Dependent Role for *Ir76b* in Detection of Amino  
518 Acid Taste. *Cell Rep* 18:737-750.
- 519 Giovannini MG, Rakovska A, Benton RS, Pazzagli M, Bianchi L, Pepeu G (2001) Effects of  
520 novelty and habituation on acetylcholine, GABA, and glutamate release from the  
521 frontal cortex and hippocampus of freely moving rats. *Neuroscience* 106:43-53.
- 522 Glanzman DL, Mackey SL, Hawkins RD, Dyke AM, Lloyd PE, Kandel ER (1989) Depletion  
523 of serotonin in the nervous system of *Aplysia* reduces the behavioral enhancement of  
524 gill withdrawal as well as the heterosynaptic facilitation produced by tail shock. *J*  
525 *Neurosci* 9:4200-4213.
- 526 Gordon MD, Scott K (2009) Motor control in a *Drosophila* taste circuit. *Neuron* 61:373-384.
- 527 Hamada FN, Rosenzweig M, Kang K, Pulver SR, Ghezzi A, Jegla TJ, Garrity PA (2008) An  
528 internal thermal sensor controlling temperature preference in *Drosophila*. *Nature*  
529 454:217-220.

- 530 Hattori D, Aso Y, Swartz KJ, Rubin GM, Abbott LF, Axel R (2017) Representations of  
531 Novelty and Familiarity in a Mushroom Body Compartment. *Cell* 169:956-969 e917.
- 532 Hawkins RD, Cohen TE, Greene W, Kandel ER (1998) Relationships between  
533 dishabituation, sensitization, and inhibition of the gill- and siphon-withdrawal reflex  
534 in *Aplysia californica*: effects of response measure, test time, and training stimulus.  
535 *Behav Neurosci* 112:24-38.
- 536 Kafkas A, Montaldi D (2018) How do memory systems detect and respond to novelty?  
537 *Neurosci Lett* 680:60-68.
- 538 Kain P, Dahanukar A (2015) Secondary taste neurons that convey sweet taste and starvation  
539 in the *Drosophila* brain. *Neuron* 85:819-832.
- 540 Kato HK, Gillet SN, Isaacson JS (2015) Flexible Sensory Representations in Auditory Cortex  
541 Driven by Behavioral Relevance. *Neuron* 88:1027-1039.
- 542 Le Bourg E (1983) Aging and habituation of the tarsal response in *Drosophila melanogaster*.  
543 *Gerontology* 29:388-393.
- 544 Letzkus JJ, Wolff SB, Luthi A (2015) Disinhibition, a Circuit Mechanism for Associative  
545 Learning and Memory. *Neuron* 88:264-276.
- 546 Liu C, Placais PY, Yamagata N, Pfeiffer BD, Aso Y, Friedrich AB, Siwanowicz I, Rubin  
547 GM, Preat T, Tanimoto H (2012) A subset of dopamine neurons signals reward for  
548 odour memory in *Drosophila*. *Nature* 488:512-516.
- 549 Minnich DE (1921) An experimental study of the tarsal chemoreceptors of two nymphalid  
550 butterflies. *Journal of Experimental Zoology* 33:172-203.
- 551 Montell C (2009) A taste of the *Drosophila* gustatory receptors. *Curr Opin Neurobiol* 19:345-  
552 353.



- 553 Morrens J, Aydin C, Janse van Rensburg A, Esquivelzeta Rabell J, Haesler S (2020) Cue-  
554 Evoked Dopamine Promotes Conditioned Responding during Learning. *Neuron*  
555 106:142-153 e147.
- 556 Ogg MC, Ross JM, Bendahmane M, Fletcher ML (2018) Olfactory bulb acetylcholine release  
557 dishabituates odor responses and reinstates odor investigation. *Nat Commun* 9:1868.
- 558 Paranjpe P, Rodrigues V, VijayRaghavan K, Ramaswami M (2012) Gustatory habituation in  
559 *Drosophila* relies on rutabaga (adenylate cyclase)-dependent plasticity of GABAergic  
560 inhibitory neurons. *Learn Mem* 19:627-635.
- 561 Pimentel D, Donlea JM, Talbot CB, Song SM, Thurston AJF, Miesenbock G (2016)  
562 Operation of a homeostatic sleep switch. *Nature* 536:333-337.
- 563 Ramaswami M (2014) Network plasticity in adaptive filtering and behavioral habituation.  
564 *Neuron* 82:1216-1229.
- 565 Ranganath C, Rainer G (2003) Neural mechanisms for detecting and remembering novel  
566 events. *Nat Rev Neurosci* 4:193-202.
- 567 Rankin CH, Abrams T, Barry RJ, Bhatnagar S, Clayton DF, Colombo J, Coppola G, Geyer  
568 MA, Glanzman DL, Marsland S, McSweeney FK, Wilson DA, Wu CF, Thompson  
569 RF (2009) Habituation revisited: an updated and revised description of the behavioral  
570 characteristics of habituation. *Neurobiol Learn Mem* 92:135-138.
- 571 Shen Y, Dasgupta S, Navlakha S (2020) Habituation as a neural algorithm for online odor  
572 discrimination. *Proc Natl Acad Sci U S A* 117:12402-12410.
- 573 Smith JJ, Shionoya K, Sullivan RM, Wilson DA (2009) Auditory stimulation dishabituates  
574 olfactory responses via noradrenergic cortical modulation. *Neural Plast* 2009:754014.
- 575 Sridharan D, Knudsen EI (2015) Selective disinhibition: A unified neural mechanism for  
576 predictive and post hoc attentional selection. *Vision Res* 116:194-209.

- 577 Steck K, Walker SJ, Itskov PM, Baltazar C, Moreira JM, Ribeiro C (2018) Internal amino  
578 acid state modulates yeast taste neurons to support protein homeostasis in *Drosophila*.  
579 *Elife* 7.
- 580 Stocker RF (1994) The organization of the chemosensory system in *Drosophila*  
581 *melanogaster*: a review. *Cell Tissue Res* 275:3-26.
- 582 Thompson RF, Spencer WA (1966) Habituation: a model phenomenon for the study of  
583 neuronal substrates of behavior. *Psychol Rev* 73:16-43.
- 584 Vankov A, Herve-Minvielle A, Sara SJ (1995) Response to novelty and its rapid habituation  
585 in locus coeruleus neurons of the freely exploring rat. *Eur J Neurosci* 7:1180-1187.
- 586 Wang X-J, Yang GR (2018) A disinhibitory circuit motif and flexible information routing in  
587 the brain. *Current opinion in neurobiology* 49:75-83.
- 588 Wisotsky Z, Medina A, Freeman E, Dahanukar A (2011) Evolutionary differences in food  
589 preference rely on Gr64e, a receptor for glycerol. *Nat Neurosci* 14:1534-1541.
- 590 Zaccardi ML, Traina G, Cataldo E, Brunelli M (2004) Sensitization and dishabituation of  
591 swim induction in the leech *Hirudo medicinalis*: role of serotonin and cyclic AMP.  
592 *Behav Brain Res* 153:317-326.
- 593 Zhao C, Widmer YF, Diegelmann S, Petrovici MA, Sprecher SG, Senn W (2021) Predictive  
594 olfactory learning in *Drosophila*. *Sci Rep* 11:6795.

595

596

597 **FIGURE LEGENDS**

598 **Figure 1. Gustatory habituation of PER to sweet taste.**

599 (A) Behavioural protocol of PER habituation to tarsal stimulation following sucrose exposure.  
600 (B) Tarsal exposure to 10% sucrose for 10 minutes leads to decrease in PER response (\*\*p<  
601 0.0001, Wilcoxon signed rank test) whereas exposure to water does not affect the response (p>  
602 0.05). (C) As previously described (Paranjpe et al, 2012), gustatory habituation is dependent  
603 on the Rutabaga adenylate cyclase since it is impaired in *rut*<sup>2080</sup> mutants. Habituation can be  
604 restored by expressing wild type *rut* in inhibitory *Gad1-Gal4* neurons (\*\*p < 0.006, Mann  
605 Whitney U test). (D) The habituated response can be overridden by a novel mechanical  
606 stimulus like vortexing (\*p = 0.01, Friedman test). (E) Vortexing does not have an effect on  
607 naïve response to sucrose (p = 0.0518, p= 0.67, p= 0.16, Wilcoxon signed rank test) as,  
608 determined by testing PER response pre and post vortexing at different sucrose concentrations.  
609 Therefore, the enhanced PER response after vortexing habituated animals is not a result of  
610 general sensitization but instead represents a specific override of habituation to sucrose. Bars  
611 represent mean±SEM, ns represents not statistically significant, p>0.05.

612

613 **Figure 2. Habituation override mediated by novel stimulus**

614 (A) Behaviour protocol of PER habituation and its override by presenting stimulus to the  
615 labellum (B) Presentation of novel 10% yeast stimulus to labellum restores PER response (\*p  
616 = 0.014 Friedman test) whereas 10% sucrose, which is a familiar stimulus, does not have an  
617 effect on habituated response (p > 0.99, Friedman test). (C1) Expression pattern of *Ir25a-Gal4*  
618 in the adult brain. *Ir25a-Gal4* is expressed in gustatory receptor neurons, predominantly bitter  
619 and sweet sensory neurons in the subesophageal zone (SEZ), as well as some olfactory receptor  
620 neurons in the antennal lobe (AL). (C2) Directly activating yeast responsive *Ir25a-Gal4* cells

621 expressing heat activated channel *TRPA1* for 1 minute after habituation at 32°C, is sufficient  
622 to override PER habituation to sucrose (\*\*p = 0.0012, Friedman test) (*Ir25a-Gal4/+* p > 0.99,  
623 *UAS-TRPA1/+*, p > 0.99, Friedman test). **(D1)** Expression pattern of *Gr66a-Gal4* in the  
624 subesophageal zone (SEZ) region of adult brain. The bitter sensory neurons marked by *Gr66a*  
625 form a ringed structure; they project to the anterior region of the SEZ. **(D2)** Thermogenetic  
626 activation of bitter *Gr66a*-marked GRNs for 1 minute after habituation at 32°C, also overrides  
627 sweet-taste habituation (\*\*p = 0.0042, Friedman test) whereas no difference is observed in  
628 controls (*Gr66a-Gal4/+* > 0.99, *UAS-TRPA1/+*, p > 0.99, Friedman test). Together the data  
629 show that stimulus-novelty drives override of habituation. Bars represent mean±SEM, ns  
630 represents not statistically significant, p>0.05.

631

632 **Figure 3. Novelty induced habituation override does not induce sensitization of sensory**  
633 **response**

634 **(A)** Labellar exposure to 10% yeast does not increase the naïve PER response to 0.1%, 0.5%,  
635 1% or 2% sucrose stimulation (Probabilities of PER being unchanged using the Wilcoxon sign  
636 rank test: p = 0.64, p = 0.67, p = 0.19 and p = 0.12, at the 4 respective sucrose concentrations).  
637 **(B)** Thermogenetic activation of *Ir25a-Gal4* does not sensitize response to sucrose tested at  
638 concentration 0.1% (p > 0.99, Wilcoxon sign rank test), 0.5% (p = 0.5938, Wilcoxon sign rank  
639 test), 1% (p = 0.7588, Wilcoxon sign rank test), 2% (p = 0.4814, Wilcoxon sign rank test).  
640 **(C)** Thermogenetic activation of *Gr66a-Gal4* does not have an effect on response to 0.1% (p =  
641 0.5, Wilcoxon sign rank test), 0.5% (p > 0.99, Wilcoxon sign rank test), 1% (p = 0.375,  
642 Wilcoxon sign rank test), 2% (p = 0.3828, Wilcoxon sign rank test) concentrations of sucrose.  
643 Points represent mean±SEM, ns represents not statistically significant, p>0.05.

644

645 **Figure 4. Activation TH expressing neurons overrides habituation**

646 **(A)** Thermogenetic activation of TH expressing neurons for 1 minute at 32°C after habituation  
647 results in habituation override (\*\**p* = 0.0004, Friedman test) (*TH-Gal4/+*, *p* >0.99, *UAS-*  
648 *TRPA1/+*, *p* > 0.99, *TH-Gal4/UAS-TRPA1* temperature control, *p* = 0.8665, Friedman test). **(B)**  
649 Activation of TH expressing neurons does not lead to sensitization of gustatory response tested  
650 at 0.1% (*p* = 0.09, Wilcoxon sign rank test), 0.5% (*p* = 0.1, Wilcoxon sign rank test), 1% (*p* =  
651 0.14, Wilcoxon sign rank test), 2% (*p* = 0.14, Wilcoxon sign rank test). **(C)** Activation of a  
652 subset of TH expressing cells marked by *TH-C'-Gal4* for 1 minute after habitation at 32°C is  
653 sufficient to override habituated response to sucrose (\*\**p* = 0.0042, Friedman test) (*TH Gal4/+*,  
654 *p* = 0.4914, *UAS-TRPA1/+*, *p* > 0.99, Friedman test) (*TH-C'- Gal4* temperature control, *p* >  
655 0.99, Friedman test). **(D)** Activation of *TH-D'* subset of neurons, which marks subset of  
656 neurons that does not overlap with *TH-C'*, for 1 minute after habituation at 32°C does not  
657 override habituation (*p* > 0.99, Friedman test). **(E)** Combining *TH-C-Gal80* along with *TH*  
658 *Gal4* blocks the expression in *TH-C'* subset of neurons only, as observed by GFP expression  
659 (SEZ represents subesophageal zone). **(F)** The flies carrying *TH-C-Gal80* along with *TH-Gal4*  
660 fail to show habituation override when these are activated at 32°C after habituation further  
661 confirming the role of *TH-C'* subset of neurons (*p* >0.99, Friedman test) (*TH-Gal4/ UAS-*  
662 *TRPA1*, \*\**p* = 0.0025, Friedman test) (*TH-C-Gal80/+*, *p* = 0.9061, Friedman test) (*UAS-*  
663 *TRPA1/+*, *p* > 0.99, Friedman test). **(G)** Activation of *TH-C' Gal4* neurons does not affect the  
664 naïve response to sucrose tested at 0.1% (*p* = 0.56, Wilcoxon sign rank test), 0.5% (*p* = 0.37,  
665 Wilcoxon sign rank test), 1% (*p* = 0.73, Wilcoxon sign rank test), 2% (*p* = 0.31, Wilcoxon sign  
666 rank test). Bars represent mean ±SEM, points represent mean ±SEM, ns represents not  
667 statistically significant, *p*>0.05.

668

669 **Figure 5. Activity of *TH-C'* subset of neurons is necessary for novelty induced override**

670 (A) At permissive temperature (RT = 21°C), presentation of 10% yeast to the labellum  
671 overrides habituation in both *TH-C' Gal4/ UAS-Shi<sup>ts1</sup>* (\*\*p = 0.0008, Friedman test) and *TH-*  
672 *Gal4/+;UAS-Shi<sup>ts1</sup>/+* flies and (\*p = 0.0457, Friedman test) respectively. However, at  
673 restrictive temperature (34°C) blocking the synaptic transmission of *TH-Gal4* and *TH-C'-Gal4*  
674 neurons by expressing *Shi<sup>ts1</sup>* during presentation of novel yeast stimulus after habituation to  
675 sucrose, impairs habituation override (*TH-Gal4/+;UAS-Shi<sup>ts1</sup>/+*, p = 0.3897, Friedman test)  
676 (*TH-C'-Gal4/ UAS-Shi<sup>ts1</sup>*, p > 0.99, Friedman test) respectively. The genotypic controls show  
677 override of habituation to 10% yeast presented to the labellum (*TH-Gal4/+*, \*\*p = 0.0015,  
678 Friedman test) (*UAS-Shi<sup>ts1</sup>/+*, \*\*\*p = 0.0009, Friedman test), (*TH-C'-Gal4/+*, \*\*\*p = 0.0001,  
679 Friedman test) (B) Blocking *TH-Gal4* neurons and *TH-C'-Gal4* neurons does not have an effect  
680 on PER itself (p = 0.1909 and p = 0.914, respectively, Wilcoxon sign rank). Bars represent  
681 mean ± SEM, ns represents not statistically significantly, p>0.05.

682

683 **Figure 6. TH Gal4 neurons are functionally connected to GRNs**

684 (A) Expression pattern of Gr66a with respect to TH expressing neurons. (B) GRASP between  
685 Gr66a and TH expressing neurons show GFP signal in animals expressing both the components  
686 of split GFP. No signal is observed in controls lacking either of split GFP component. (C)  
687 Controls do not show any significant increase in response at 34°C (*Gr66a LexA/+; TH-Gal4/+*,  
688 p = 0.9079, *LexAop-TRPA1/+; UAS-Shits1/+*, p = 0.0580, Friedman test). Activation of Gr66a  
689 while inhibiting TH expressing neurons simultaneously fails to reinstate habituated response  
690 (*Gr66a LexA/ LexAop-TRPA1; TH-Gal4/ UAS-Shits1*, p= 0.9494, Friedman test), whereas  
691 activating Gr66a solely overrides habituation (*Gr66a LexA/ LexAop-TRPA1; TH-Gal4/ +*, \*p  
692 = 0.02). Control at permissive temperature does not show any difference in habituated response

693 (*Gr66a LexA/ LexAop-TRPA1; TH-Gal4/ UAS-Shit<sup>sl</sup>*,  $p > 0.99$ , Friedman test). Bars represent  
694 mean  $\pm$  SEM, ns represents not statistically significantly,  $p > 0.05$ , SEZ represents  
695 subesophageal zone.

696

697 **Figure 7: Circuit model for PER habituation override.**

698 Model for habituation override in gustatory system of *Drosophila*. As shown in Paranjpe et al,  
699 2012, plasticity of GABAergic neurons underlies habituation. During habituation override,  
700 excitation of sensory neurons responsive to novel stimulus activates *TH-C'* subset of  
701 dopaminergic neurons either directly or indirectly via a probable intermediate neuron. As there  
702 is weak inhibition mediated by local inhibitory interneurons (iLNs) onto *TH-C'* neurons in this  
703 pathway, these dopaminergic neurons exhibit strong excitation and in turn inhibit iLNs that are  
704 potentiated during habituation. As a result, disinhibition leads to strong excitation of projection  
705 neurons (PNs) and therefore, strong PER in response to familiar stimulus. In contrast,  
706 excitation of sensory neurons responsive to familiar stimulus activates *TH-C'* neurons but due  
707 to strong iLN inhibition onto *TH-C'* neurons resulting from habituation in this pathway,  
708 dopaminergic neurons fail to disinhibit. This leads to weak PN excitation and therefore, weak  
709 PER in response to the familiar stimulus.

710

711

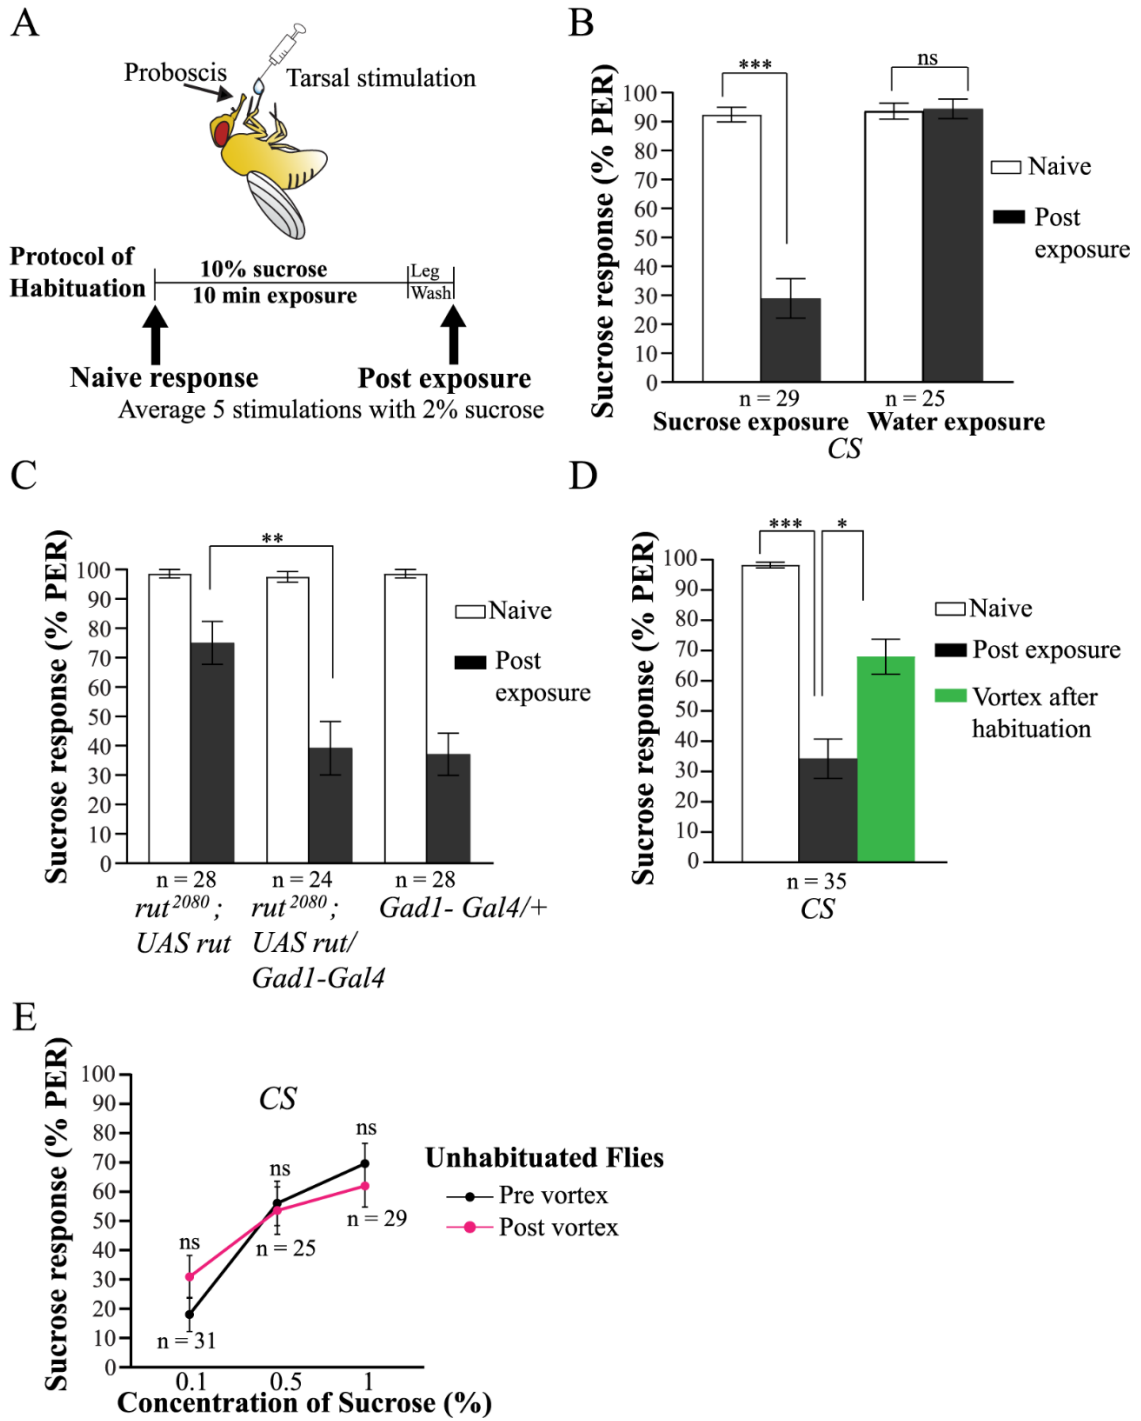



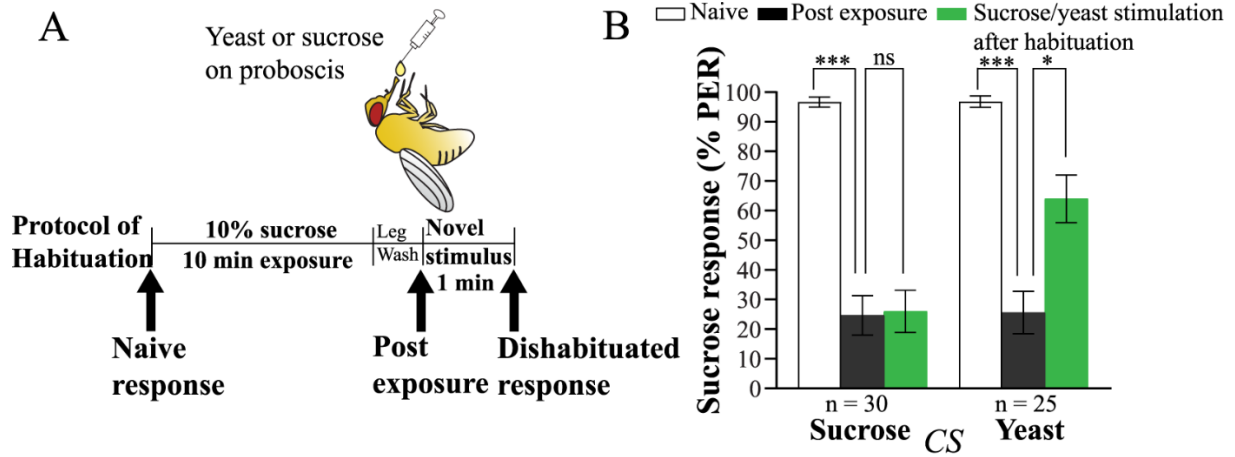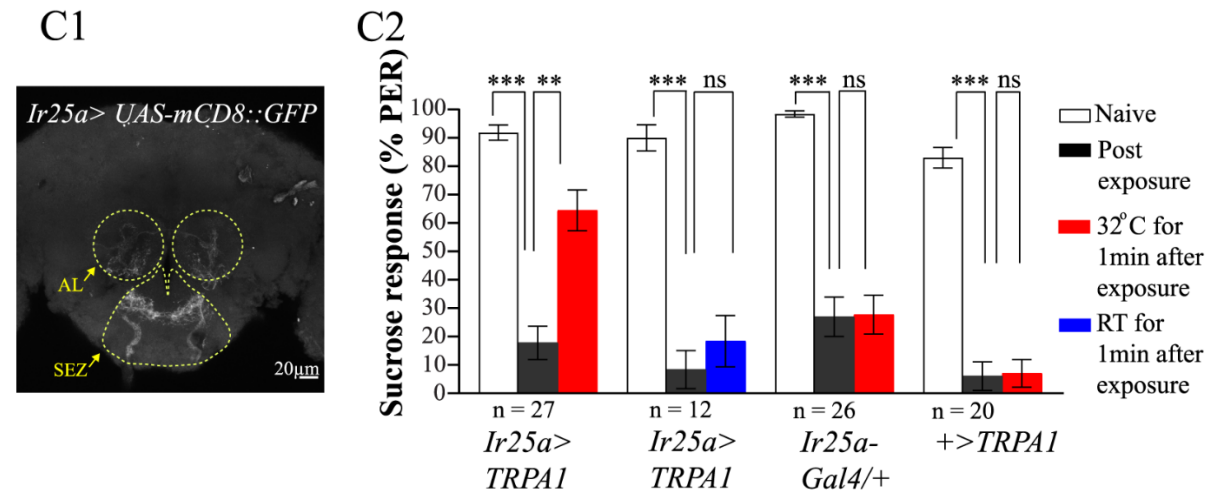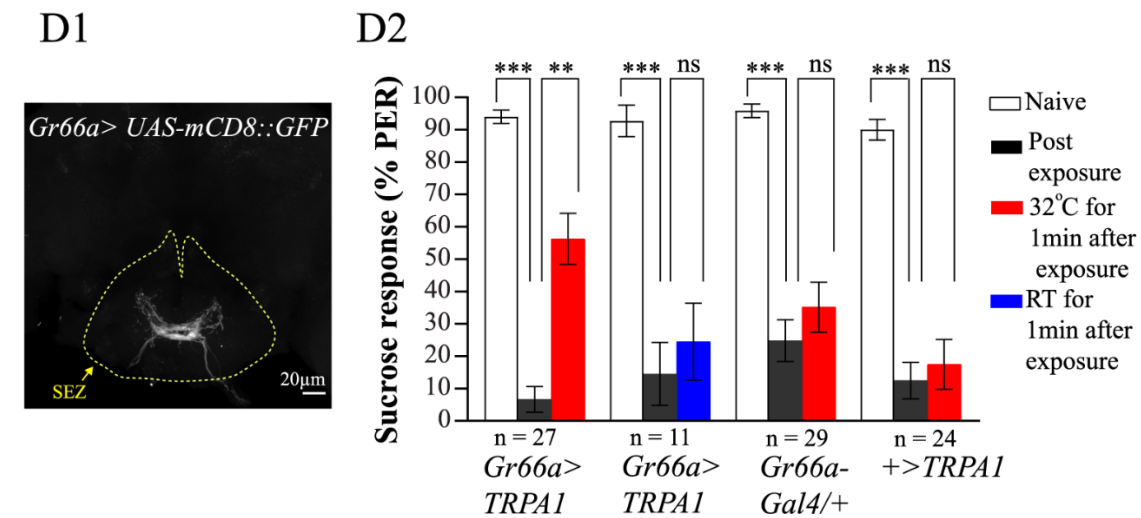

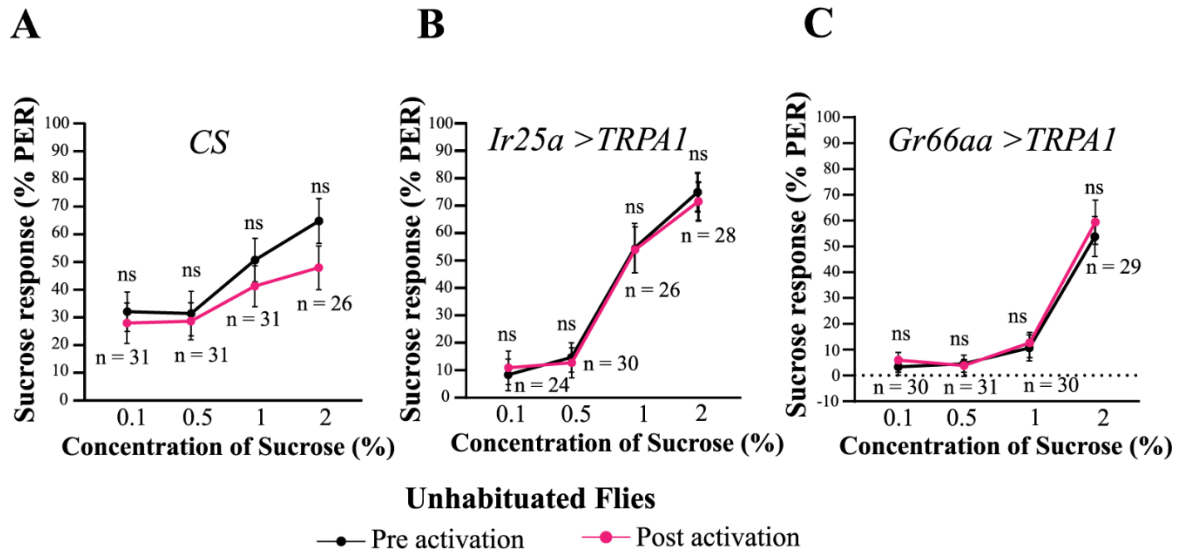

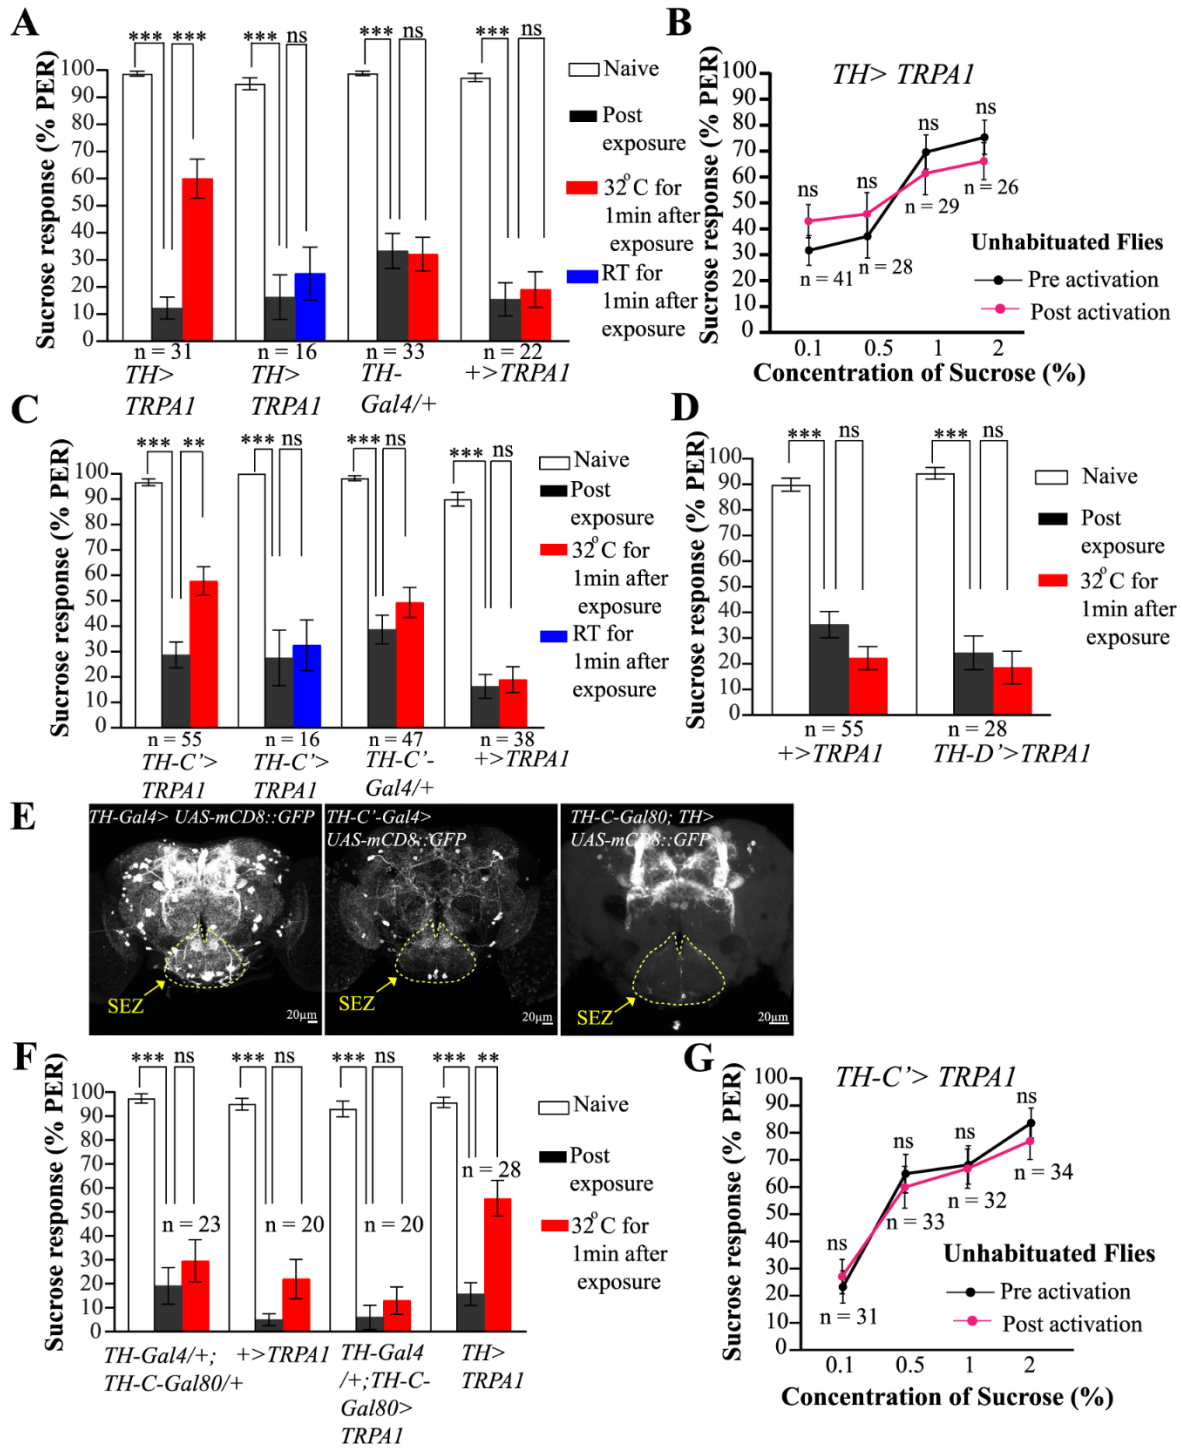

**A**

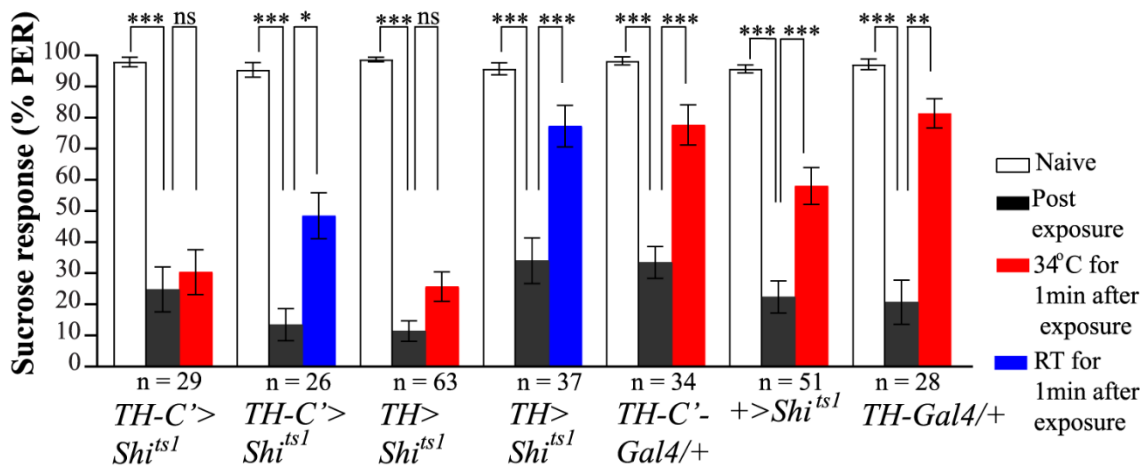

**B**

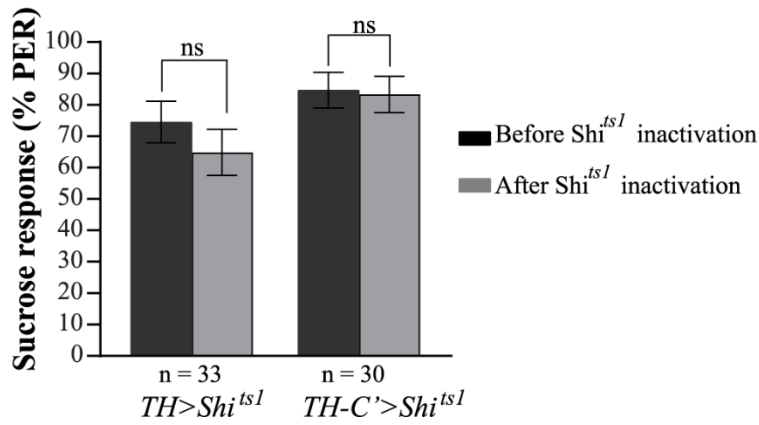

**A**

**Gr66a-LexA; TH-Gal4 > UAS-mCD8:: RFP, LexAop-mCD8::GFP**

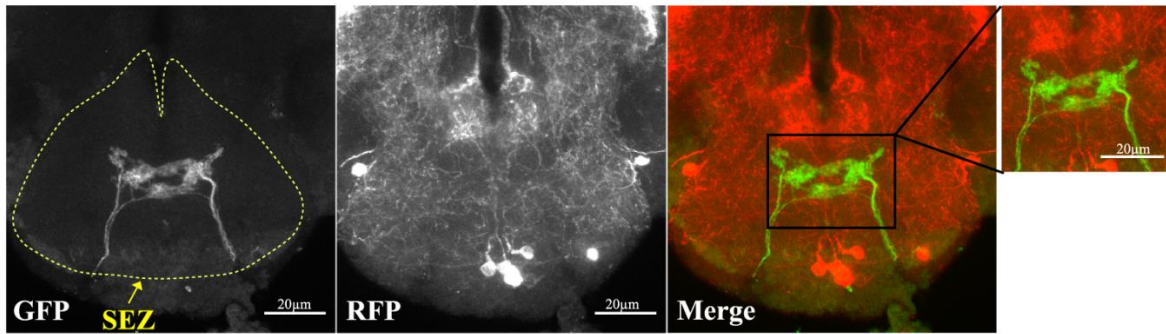

**B**

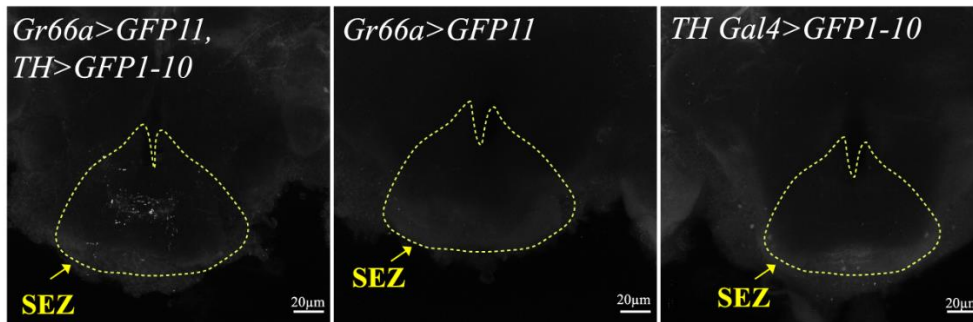

**C**

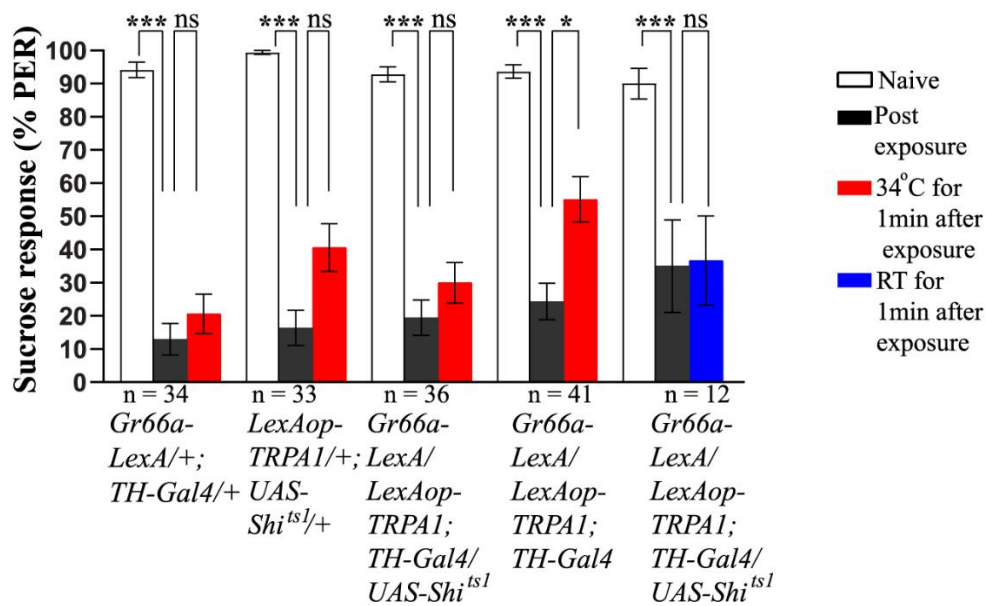

*Inhibitory inputs weak for novel stimuli but  
potentiated for familiar ones*

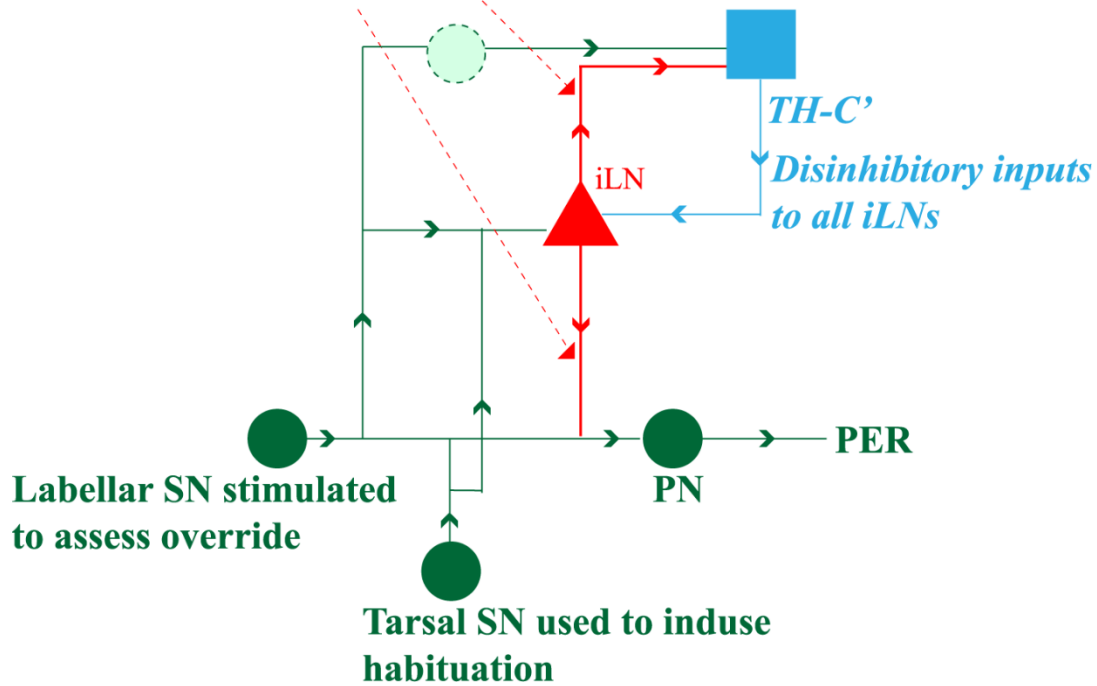

Source: https://www.biorxiv.org/content/10.1101/2021.09.11.459900v1.full.pdf
